# Supplementary material for: Design and Construction of a Mixed-Ligand Coordinated Fluorescent Complex and Its Application for Sensing Ions, Antibiotics, and Pesticides in Aqueous Solution
Source: MDPI journal article supplement (doi:10.3390/inorganics12040093), 2024-03-22
Supplement: s1 [file s1]

## Article

# Design and Construction of a Mixed-Ligand Coordinated Fluorescent Complex and Its Application for Sensing Ions, Antibiotics, and Pesticides in Aqueous Solution

Gao-Sheng Zhu <sup>1</sup>, Yi Jia <sup>2</sup>, Jia-Yao Ding <sup>1</sup>, Hao Yin <sup>1</sup>, Yan Chen <sup>1</sup>, Bao-Yi Yu <sup>1,\*</sup>, Yan-Ying Zheng <sup>1,\*</sup>  
and Francis Verpoort <sup>3,4,\*</sup>

<sup>1</sup> Key Laboratory of Urban Agriculture in North China, Ministry of Agriculture P.R. China, College of Bioscience and Resources Environment, Beijing University of Agriculture, Beijing 102206, China; zhugaoshengbua@163.com (G.-S.Z.); yyqx17710825739@163.com (J.-Y.D.); 202230121128@bua.edu.cn (H.Y.); chen@bua.edu.cn (Y.C.)

<sup>2</sup> CAS Key Lab of Colloid, Interface and Chemical Thermodynamics, Institute of Chemistry, Chinese Academy of Sciences, Beijing 100190, China; jiayi@iccas.ac.cn

<sup>3</sup> State Key Laboratory of Advanced Technology for Materials Synthesis and Processing, Wuhan University of Technology, Wuhan 430070, China

<sup>4</sup> Research School of Chemical and Biomedical Technologies, National Research Tomsk Polytechnic University, Lenin Avenue 30, 634050 Tomsk, Russia

\* Correspondence: baoyi.yu@bua.edu.cn (B.-Y.Y.); huaxue@bua.edu.cn (Y.-Y.Z.); francis@whut.edu.cn (F.V.); Tel.: +86-135-1106-6021 (B.-Y.Y.)

**Table S1.** Crystal data for Complex Zn.

|                                           |                                                                        |
|-------------------------------------------|------------------------------------------------------------------------|
| CCDC No.                                  | 2082189                                                                |
| Formula                                   | C <sub>42</sub> H <sub>33.6</sub> N <sub>14</sub> O <sub>10.8</sub> Zn |
| Formula weight                            | 972.60                                                                 |
| Temperature/K                             | 150.0(1)                                                               |
| Crystal system                            | Triclinic                                                              |
| Space group                               | P $\bar{1}$                                                            |
| <i>a</i> / Å                              | 6.833(1)                                                               |
| <i>b</i> / Å                              | 9.549(1)                                                               |
| <i>c</i> / Å                              | 16.521(3)                                                              |
| $\alpha$ / °                              | 94.292(4)                                                              |
| $\beta$ / °                               | 96.712(5)                                                              |
| $\gamma$ / °                              | 104.117(5)                                                             |
| <i>V</i> / Å <sup>3</sup>                 | 1032.2(3)                                                              |
| <i>Z</i>                                  | 1                                                                      |
| $\rho_{\text{calc}}$ [g/cm <sup>3</sup> ] | 1.65                                                                   |
| $\mu$ / mm <sup>-1</sup>                  | 0.677                                                                  |
| F(000)                                    | 500.0                                                                  |
| Crystal size/mm <sup>3</sup>              | 0.27 × 0.21 × 0.2                                                      |
| Radiation                                 | MoK $\alpha$ ( $\lambda$ = 0.71073)                                    |
| 2 $\theta$ range for data collection / °  | 4.424 to 52.892                                                        |
| Index ranges                              | -8 ≤ <i>h</i> ≤ 8, -11 ≤ <i>k</i> ≤ 11, -20 ≤ <i>l</i> ≤ 20            |
| Reflections collected                     | 11184                                                                  |

|                                                        |                                                                  |
|--------------------------------------------------------|------------------------------------------------------------------|
| Independent reflections                                | 4202 [ $R_{\text{int}} = 0.0914$ , $R_{\text{sigma}} = 0.1334$ ] |
| Data/restraints/parameters                             | 4202/380/369                                                     |
| Goodness-of-fit on $F^2$                               | 1.038                                                            |
| Final $R$ indexes [ $I \geq 2\sigma(I)$ ] <sup>a</sup> | $R_1 = 0.0719$ , $wR_2 = 0.1293$                                 |
| Final $R$ indexes [all data] <sup>b</sup>              | $R_1 = 0.1554$ , $wR_2 = 0.1630$                                 |
| Largest diff. peak/hole / e $\text{\AA}^{-3}$          | 0.53/-0.67                                                       |

[a]  $R_1 = \sum |F_o| - |F_c| / \sum |F_o|$ ; [b]  $wR_2 = [\sum [w(F_o^2 - F_c^2)^2] / \sum [(F_o^2)^2]]^{1/2}$ .

**Table S2.** The selected bond lengths [ $\text{\AA}$ ] and angles [ $^\circ$ ] for Complex Zn.

| Atoms                                 | Bond length [ $\text{\AA}$ ] | Atoms                 | Bond length [ $\text{\AA}$ ] | Atoms     | Bond length [ $\text{\AA}$ ] | Atoms     | Bond length [ $\text{\AA}$ ] |
|---------------------------------------|------------------------------|-----------------------|------------------------------|-----------|------------------------------|-----------|------------------------------|
| Zn1O1                                 | 2.115(3)                     | N5C18                 | 1.414(6)                     | C2C7      | 1.3900                       | C18C19    | 1.376(6)                     |
| Zn1O1 <sup>#1</sup>                   | 2.115(3)                     | N5C20                 | 1.333(6)                     | C2C3      | 1.3900                       | C18C17    | 1.382(7)                     |
| Zn1O1W <sup>#1</sup>                  | 2.117(4)                     | N5N6                  | 1.41(2)                      | C7C8      | 1.446(6)                     | N3C14     | 1.28(4)                      |
| Zn1O1W                                | 2.117(4)                     | O4C12                 | 1.22(2)                      | N2N3      | 1.357(5)                     | N6C21     | 1.32(3)                      |
| Zn1N1 <sup>#1</sup>                   | 2.109(4)                     | C15C19                | 1.384(6)                     | N2C15     | 1.424(6)                     | C8C9      | 1.372(8)                     |
| Zn1N1                                 | 2.109(4)                     | C15C16                | 1.375(6)                     | N2C13     | 1.337(6)                     | C11C10    | 1.374(9)                     |
| O1C1                                  | 1.263(6)                     | C1C2                  | 1.518(5)                     | N4C17     | 1.338(6)                     | C9C10     | 1.388(9)                     |
| O2C1                                  | 1.263(6)                     | C12C5                 | 1.518(5)                     | N4C16     | 1.331(6)                     | C4C3      | 1.3900                       |
| N1C13                                 | 1.327(6)                     | C6C7                  | 1.3900                       | O3C12     | 1.31(2)                      | C5C4      | 1.3900                       |
| N1C14A                                | 1.34(3)                      | C6C5                  | 1.3900                       | N7C20     | 1.25(8)                      |           |                              |
| N1C14                                 | 1.40(3)                      | C6C11                 | 1.493(6)                     | N7C21     | 1.4(1)                       |           |                              |
| Atoms                                 | Bond angle [ $^\circ$ ]      | Atoms                 | Bond angle [ $^\circ$ ]      | Atoms     | Bond angle [ $^\circ$ ]      | Atoms     | Bond angle [ $^\circ$ ]      |
| O1Zn1O1 <sup>#1</sup>                 | 180.0(2)                     | N1Zn1N1 <sup>#1</sup> | 180.0                        | C2C7C6    | 120.0                        | C19C15N2  | 119.6(4)                     |
| O1Zn1O1W <sup>#1</sup>                | 92.4(1)                      | C1O1Zn1               | 130.9(3)                     | C2C7C8    | 119.7(3)                     | C16C15N2  | 120.1(4)                     |
| O1Zn1O1W                              | 87.6(1)                      | C13N1Zn1              | 128.2(3)                     | C8C7C6    | 120.2(3)                     | C16C15C19 | 120.3(4)                     |
| O1 <sup>#1</sup> Zn1O1W <sup>#1</sup> | 87.6(1)                      | O2C1C2                | 118.1(4)                     | C20N5N6   | 108(1)                       | C18C19C15 | 117.5(5)                     |
| O1 <sup>#1</sup> Zn1O1W               | 92.4(1)                      | N7C20N5               | 113(5)                       | N6N5C18   | 119(1)                       | C21N6N5   | 101(2)                       |
| O1WZn1O1W <sup>#1</sup>               | 180.0                        | O3C12C5               | 112.9(9)                     | N3N2C15   | 120.7(4)                     | C9C8C7    | 121.1(6)                     |
| N1 <sup>#1</sup> Zn1O1 <sup>#1</sup>  | 91.0(1)                      | O4C12O3               | 123(1)                       | C13N2N3   | 110.1(4)                     | C10C11C6  | 121.9(6)                     |
| N1 <sup>#1</sup> Zn1O1                | 89.0(1)                      | O4C12C5               | 123.9(8)                     | C13N2C15  | 129.3(4)                     | C8C9C10   | 120.9(6)                     |
| N1Zn1O1                               | 91.0(1)                      | C7C6C5                | 120.0                        | C16N4C17  | 119.2(4)                     | C11C10C9  | 119.8(6)                     |
| N1Zn1O1 <sup>#1</sup>                 | 89.0(1)                      | C7C6C11               | 116.0(3)                     | C20N7C21  | 103(8)                       | N6C21N7   | 113(5)                       |
| N1Zn1O1W <sup>#1</sup>                | 94.3(2)                      | C5C6C11               | 124.0(3)                     | C19C18N5  | 120.7(4)                     | N3C14N1   | 116(1)                       |
| N1 <sup>#1</sup> Zn1OW <sup>#1</sup>  | 85.7(2)                      | C7C2C1                | 120.8(3)                     | C19C18C17 | 119.7(4)                     | C3C4C5    | 120.0                        |
| N1 <sup>#1</sup> Zn1O1W               | 94.3(2)                      | C3C2C1                | 119.1(3)                     | C17C18N5  | 119.6(4)                     | C2C3C4    | 120.0                        |
| N1Zn1O1W                              | 85.5(2)                      | C3C2C7                | 120.0                        | C4C5C6    | 120.0                        | O1C1C2    | 116.8(4)                     |
| C13N1C14                              | 100(1)                       | N4C16C15              | 121.5(4)                     | N4C17C18  | 121.7(5)                     | O1C1O2    | 125.0(5)                     |
| C14N1Zn1                              | 131(1)                       | C6C5C12               | 121.9(3)                     | N1C13N2   | 110.4(4)                     |           |                              |
| C20N5C18                              | 130.7(4)                     | C4C5C12               | 118.1(3)                     | C14N3N2   | 102.3(7)                     |           |                              |

Symmetry transformation: #11-x, 1-y, 1-z.

**Table S3.** Chemical structure of the selected antibiotics.

| Kind            | Name (abbreviation)             | Chemical structure                                                                    |
|-----------------|---------------------------------|---------------------------------------------------------------------------------------|
| Lactams         | Benzylpenicillin potassium (PK) | 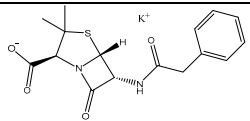   |
|                 | Penicillin V potassium (PVK)    |    |
|                 | Amoxicillin (AML)               |    |
| Aminoglycosides | Cefixime (CFX)                  |   |
|                 | Gentamicin (GTM)                |  |
|                 | Kanamycin (KNM)                 |  |
|                 | Tobramycin (TOB)                |  |

Streptomycin (SM)

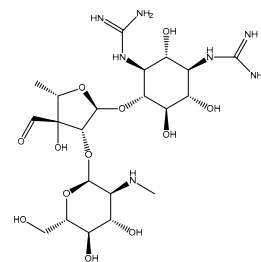

Chloramphenicol (CAP)

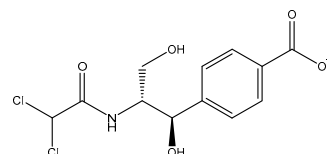

Chloramphenicols

Thiamphenicol (TAP)

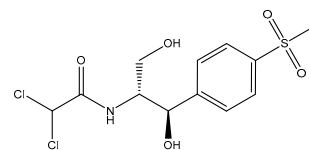

Roxithromycin (ROX)

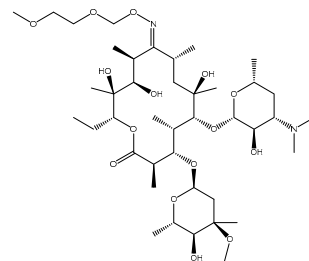

Macrolides

Azithromycin (AZM)

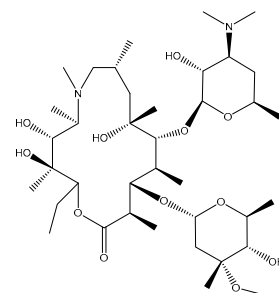

Nitrofurantoin (NFT)

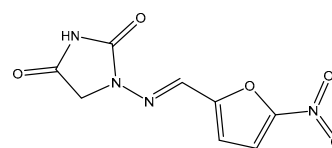

Nitrofurans

Nitrofurazone (NFZ)

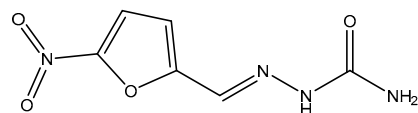

Metronidazole (MNZ)

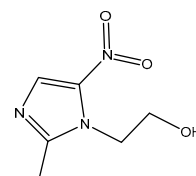

Nitroimidazoles

1,2-dimethyl-5-nitroimidazole (DMZ)

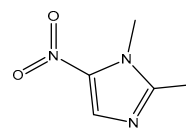

Sulfonamides

Sulfamethazine (SMZ)

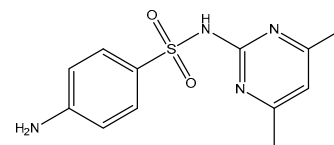**Table S4.** Chemical structure of the selected pesticides.

| Name (abbreviation)                    | Chemical structure                                                                                                                                                                  |
|----------------------------------------|-------------------------------------------------------------------------------------------------------------------------------------------------------------------------------------|
| Dipterex (DIP)                         | <p>The chemical structure of Dipterex (DIP) is a phosphonate ester: (CH<sub>3</sub>)<sub>2</sub>CH(OH)C(CH<sub>3</sub>)Cl<sub>2</sub>OP(=O)(CH<sub>3</sub>)<sub>2</sub>.</p>        |
| Pentachloro-nitrobenzene (PCNB)        | <p>The chemical structure of Pentachloro-nitrobenzene (PCNB) is a benzene ring with a nitro group (NO<sub>2</sub>) and five chlorine atoms (Cl).</p>                                |
| Imazalil (IMZ)                         | <p>The chemical structure of Imazalil (IMZ) is a benzene ring with a chlorine atom at position 1, a 2-allyloxyethyl group at position 2, and an imidazole ring at position 3.</p>   |
| Glyphosate (GLY)                       | <p>The chemical structure of Glyphosate (GLY) is a phosphonate ester: HO-P(=O)(OH)-CH<sub>2</sub>-NH-CH<sub>2</sub>-COOH.</p>                                                       |
| Chlorothalonil (TPN)                   | <p>The chemical structure of Chlorothalonil (TPN) is a benzene ring with two chlorine atoms (Cl) at positions 1 and 3, and two cyano groups (CN) at positions 2 and 4.</p>          |
| Carbendazim (CAR)                      | <p>The chemical structure of Carbendazim (CAR) is a benzimidazole ring system with a methyl ester group (COOCH<sub>3</sub>) at position 2.</p>                                      |
| 2,4-dichlorophenoxyacetic acid (2,4-D) | <p>The chemical structure of 2,4-dichlorophenoxyacetic acid (2,4-D) is a benzene ring with chlorine atoms at positions 2 and 4, and a -OCH<sub>2</sub>COOH group at position 1.</p> |
| Imidacloprid (IMI)                     | <p>The chemical structure of Imidacloprid (IMI) is a pyridine ring with a chlorine atom at position 3, and a 1-methyl-1H-imidazo[1,2-b]pyridine-5-yl group at position 4.</p>       |

Metamitron (MMT)

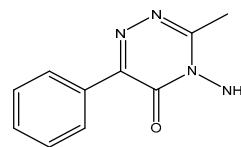

Thiophanate-methyl (TPM)

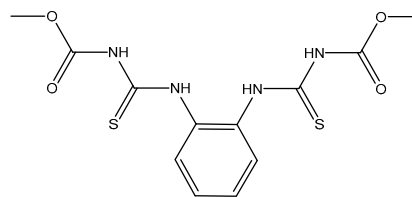

Nitenpyram (NTP)

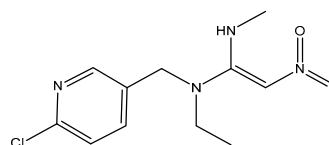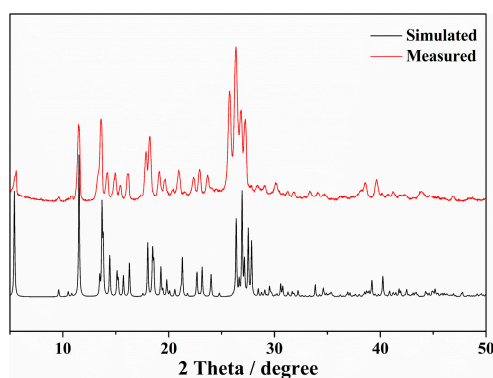

Figure S1. PXRD patterns of Complex Zn (as synthesized and simulated).

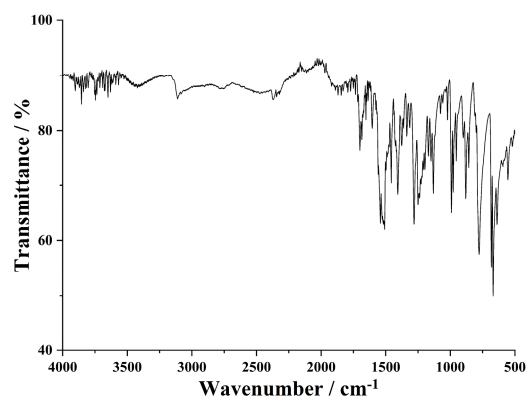

Figure S2. FT-IR spectrum of Complex Zn.

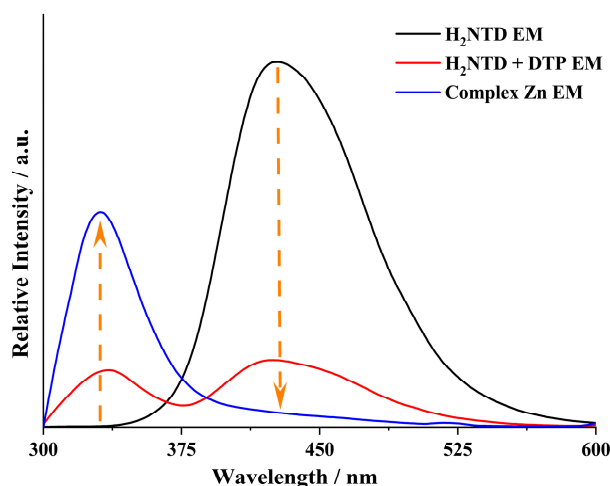

**Figure S3.** Emission spectra (excitation at 259 nm) of H<sub>2</sub>NTD, H<sub>2</sub>NTD + DTP, and Complex Zn.

It is well known that complexes bearing an H<sub>2</sub>NTD ligand exhibit excellent fluorescent properties[33,34]. Figure 4 shows that the presence of free H<sub>2</sub>NTD led to strong emission, and the intensity of the peak decreased upon the addition of an equal amount of free DTP. Under this condition, almost equal intensities which were contributed by the two ligands were observed. However, with the incorporation of the two ligands in Complex Zn, the emission of the H<sub>2</sub>NTD ligand was clearly diminished by the DTP ligand. It has been observed that charge-transfer processes, specifically ligand-ligand electron (charge) transfer (LLCT), may occur during photo-irradiation in the presence of CPs bearing electron-rich carboxylic-containing ligands and conjugated *N*-heterocyclic ligands such as polypyridine-derivatives, pyrazine-derivatives, or polyimidazole-derivatives [35]. Additionally, an alternative pathway for electron transfer (ET) may involve proton-coupled electron transfer (PECT), particularly when a hydrogen bond (N–H···O) is present within the product structure, formed between anionic carboxylate and protonated 4,4′-bipyridine species [36]. Notably, in Complex Zn's structure, an evident hydrogen bond exists between HNTD<sup>−</sup> and DTP ligands (refer to Figure 1c). A plausible scenario involves a PECT process where the carboxylic group acts as the electron donor, and the pyridyl moiety of the DTP ligand acts as the electron acceptor. Furthermore, the  $\pi\cdots\pi$  stacking within the structure of Complex Zn may facilitate electron transfer from HNTD<sup>−</sup> to DTP, thereby reducing excitation energy [37]. Hence, the observed decrease in HNTD<sup>−</sup> emission by DTP in Complex Zn during the fluorescence process can be attributed to ET.

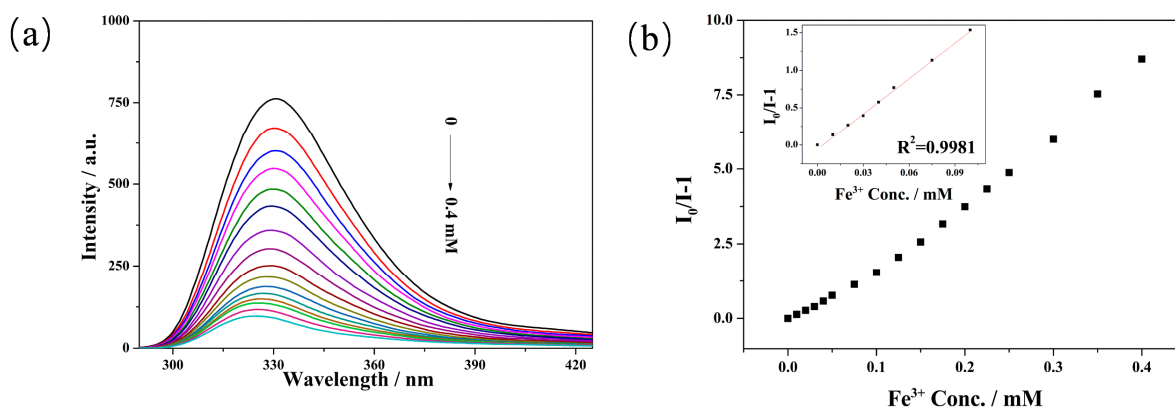

**Figure S4.** Fluorescence intensities of Complex Zn (a) dispersed in different concentrations of Fe<sup>3+</sup>; the plot of  $I_0/I - 1$  of Complex Zn (b) *vs.* concentration of Fe<sup>3+</sup> in aqueous solution (Inset: The plot of  $I_0/I - 1$  of the Complex Zn with the concentration over a Fe<sup>3+</sup> concentration range of 0–0.10 mM in aqueous solution).

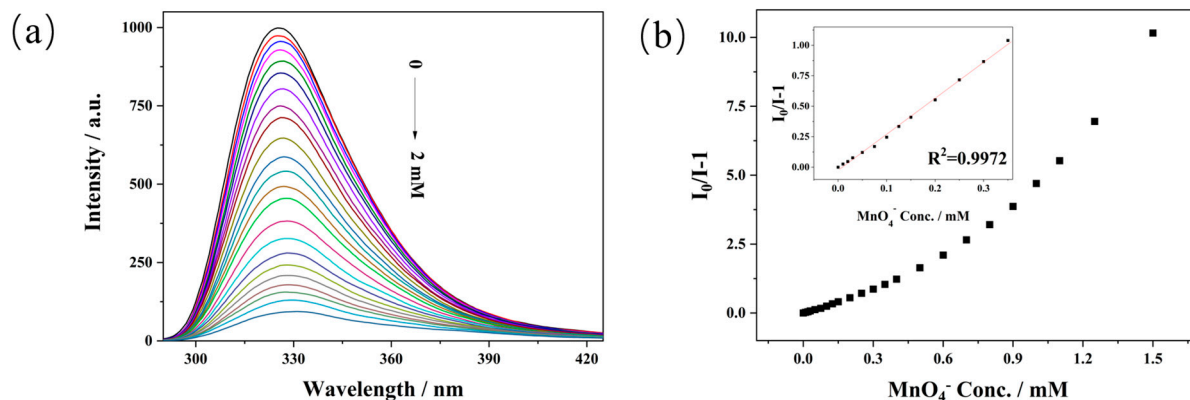

**Figure S5.** Fluorescence intensities of Complex Zn (a) dispersed in different concentrations of  $\text{MnO}_4^-$ ; the plot of  $I_0/I - 1$  of Complex Zn (b) *vs.* concentration of  $\text{MnO}_4^-$  in aqueous solution (Inset: The plot of  $I_0/I - 1$  of the Complex Zn with the concentration over a  $\text{MnO}_4^-$  concentration range of 0 - 0.35 mM in aqueous solution).

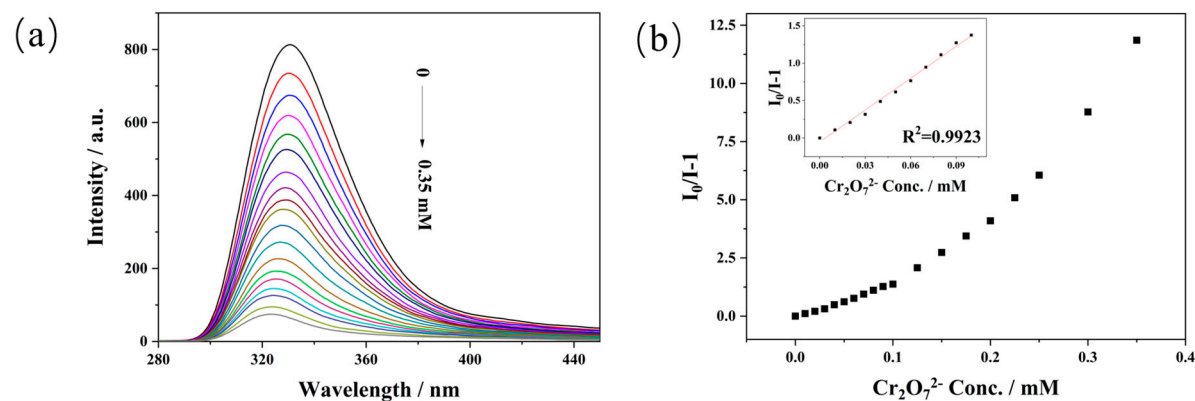

**Figure S6.** Fluorescence intensities of Complex Zn (a) dispersed in different concentrations of  $\text{Cr}_2\text{O}_7^{2-}$ ; the plot of  $I_0/I - 1$  of Complex Zn (b) *vs.* concentration of  $\text{Cr}_2\text{O}_7^{2-}$  in aqueous solution (Inset: The plot of  $I_0/I - 1$  of the Complex Zn with the concentration over a  $\text{Cr}_2\text{O}_7^{2-}$  concentration range of 0-0.10 mM in aqueous solution).

**Table S5.**  $K_{sv}$  and LODs values of Complex Zn for ions detection.

| Sensor     | Analyte                      | Concentration / $\text{mg}\cdot\text{mL}^{-1}$ | Linear range / $\mu\text{M}$ | LOD / $\mu\text{M}$ | $K_{sv} \times 10^4 / \text{M}^{-1}$ |
|------------|------------------------------|------------------------------------------------|------------------------------|---------------------|--------------------------------------|
| Complex Zn | $\text{Fe}^{3+}$             | 0.1                                            | 0-100                        | 0.60                | 1.55                                 |
| Complex Zn | $\text{MnO}_4^-$             | 0.1                                            | 0-350                        | 0.76                | 1.21                                 |
| Complex Zn | $\text{Cr}_2\text{O}_7^{2-}$ | 0.1                                            | 0-100                        | 0.56                | 1.64                                 |



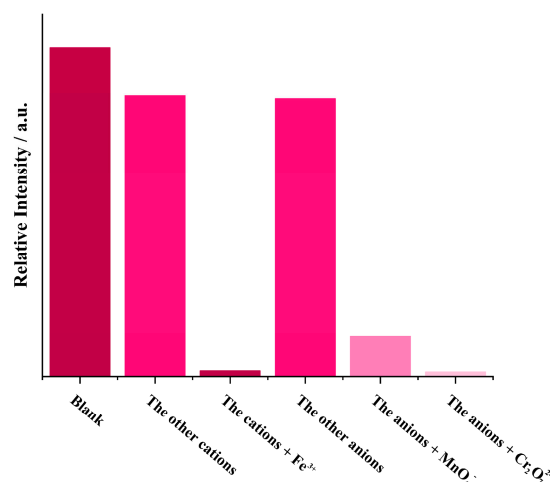

**Figure S7.** Fluorescent intensity of Complex Zn in the presence of other cations and anions (The other cations =  $K^+$ ,  $Na^+$ ,  $Mg^{2+}$ ,  $Ca^{2+}$ ,  $Ni^{2+}$ ,  $Co^{2+}$ ,  $Mn^{2+}$ ,  $Cu^{2+}$ ,  $Zn^{2+}$ ,  $Cd^{2+}$ ,  $Pb^{2+}$ ,  $Ba^{2+}$ ,  $Al^{3+}$ ,  $Cr^{3+}$  and  $Fe^{3+}$ ; The other anions =  $F^-$ ,  $Cl^-$ ,  $Br^-$ ,  $I^-$ ,  $Ac^-$ ,  $SCN^-$ ,  $NO_3^-$ ,  $ClO_3^-$ ,  $ClO_4^-$ ,  $HPO_4^{2-}$ ,  $H_2PO_4^-$ ,  $CO_3^{2-}$ ,  $B_4O_7^{2-}$ ,  $SO_3^{2-}$  and  $SO_4^{2-}$ ), before and after addition of  $Fe^{3+}$ ,  $MnO_4^-$  or  $Cr_2O_7^{2-}$ .

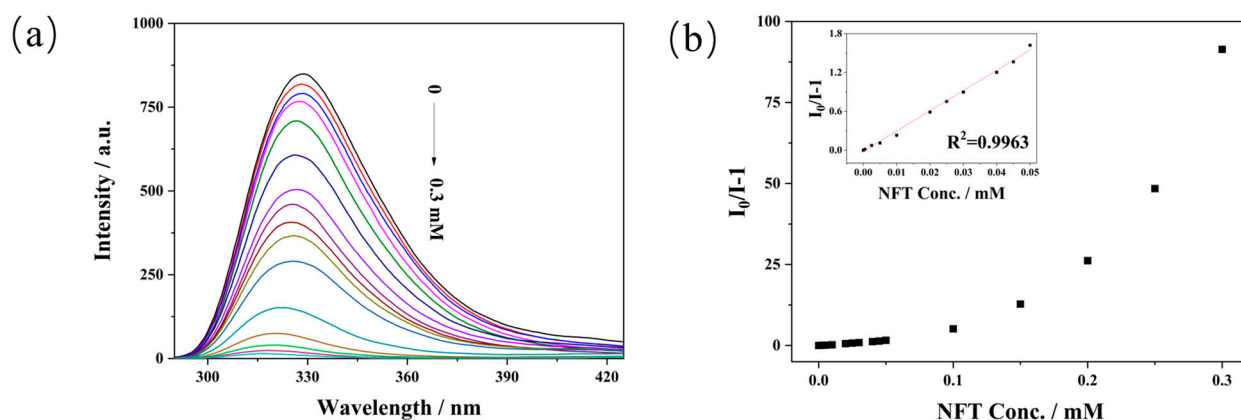

**Figure S8.** Fluorescence intensities of Complex Zn (a) dispersed in different concentrations of NFT; the plot of  $I_0/I - 1$  of Complex Zn (b) vs. concentration of NFT in aqueous solution (Inset: The plot of  $I_0/I - 1$  of the Complex Zn with the concentration over a NFT concentration range of 0–0.05 mM in aqueous solution).

**Table S6.**  $K_{sv}$  and LOD values for recently reported lanthanide CP-based luminescence probes for sensing of NFT.

| Sensor                                                        | Analyte | Concentration<br>n / $mg \cdot mL^{-1}$ | Linear<br>range / $\mu M$ | LOD /<br>$\mu M$ | $K_{sv} \times 10^4 /$<br>$M^{-1}$ | Ref.      |
|---------------------------------------------------------------|---------|-----------------------------------------|---------------------------|------------------|------------------------------------|-----------|
| Complex Zn                                                    | NFT     | 0.1                                     | 0–50                      | 0.40             | 2.34                               | This work |
| $\{[Zn(TTPBA-4)_{0.5}(TPA)] \cdot H_2O \cdot 0.5DMF\}_n$      | NFT     | -                                       | 0–10                      | -                | 2.00                               | [40]      |
| $\{[Zn(L)] \cdot CH_3CN\}_n$                                  | NFT     | 0.6                                     | -                         | 3.28             | 2.48                               | [41]      |
| RhB@ZIF-8                                                     | NFT     | 0.8                                     | 0–38                      | 0.47             | 1.80                               | [42]      |
| FSS@ZIF-8                                                     | NFT     | 0.8                                     | 0–38                      | 0.35             | 2.00                               | [43]      |
| $\{[Zn_2(TRZ)_2(DBTDC-O_2)] \cdot DMAc\}_n$                   | NFT     | 1.0                                     | 4–20                      | 0.35             | 18.00                              | [44]      |
| $[Zn_8(C_5H_4N_5)_4(C_{14}H_8O_4)_6O(C_{50}H_{44}N_4)_{0.5}]$ | NFT     | 0.5                                     | -                         | 0.56             | 4.42                               | [44]      |
| $\{[Zn(tptc)_{0.5}(bimb)] \cdot H_2O\}_n$                     | NFT     | 0.5                                     | -                         | 0.49             | 4.51                               | [45]      |

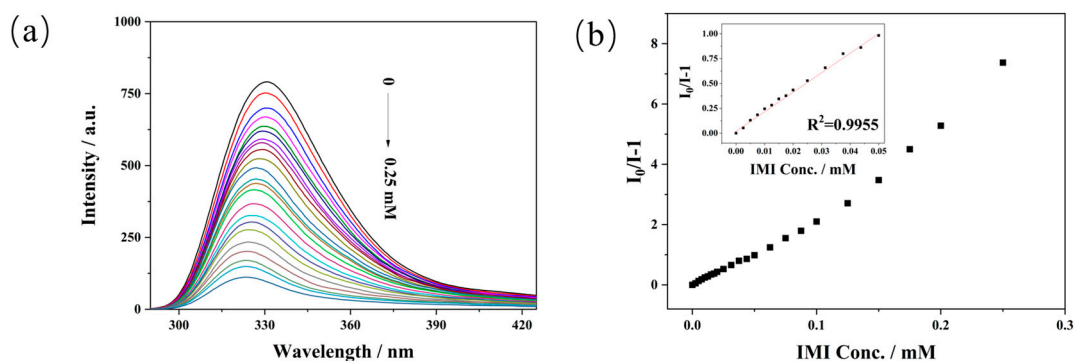

**Figure S9.** Fluorescence intensities of Complex Zn (a) dispersed in different concentrations of IMI; the plot of  $I_0/I - 1$  of Complex Zn (b) vs. concentration of IMI in aqueous solution (Inset: The plot of  $I_0/I - 1$  of the Complex Zn with the concentration over a IMI concentration range of 0 - 0.05 mM in aqueous solution).

**Table S7.**  $K_{sv}$  and LOD values for recently reported CP-based luminescence probes for IMI.

| Sensor                                                                                             | Analyte | Concentration / $\text{mg}\cdot\text{mL}^{-1}$ | Linear range / $\mu\text{M}$ | LOD / $\mu\text{M}$ | $K_{sv} \times 10^4 / \text{M}^{-1}$ | Ref.      |
|----------------------------------------------------------------------------------------------------|---------|------------------------------------------------|------------------------------|---------------------|--------------------------------------|-----------|
| Complex Zn                                                                                         | IMI     | 0.10                                           | 0-50                         | 0.29                | 3.15                                 | This work |
| [Tb(PMBB) <sub>1.5</sub> (H <sub>2</sub> O) <sub>2</sub> ]                                         | IMI     | 1.00                                           | 0-100                        | 0.26                | 3.01                                 | [46]      |
| [Eu(PMBB) <sub>1.5</sub> (H <sub>2</sub> O) <sub>2</sub> ]                                         | IMI     | 1.00                                           | 0-100                        | 0.29                | 2.63                                 | [46]      |
| [Zn(BTC)(DTP)] $\cdot$ (CH <sub>3</sub> CN) <sub>1.5</sub> $\cdot$ (H <sub>2</sub> O) <sub>4</sub> | IMI     | 0.10                                           | 0-50                         | 2.51                | 3.05                                 | [47]      |
| [Zn(DTP)SO <sub>4</sub> (H <sub>2</sub> O) <sub>3</sub> ] <sub>n</sub>                             | IMI     | 0.10                                           | 0-40                         | 0.28                | 3.31                                 | [48]      |

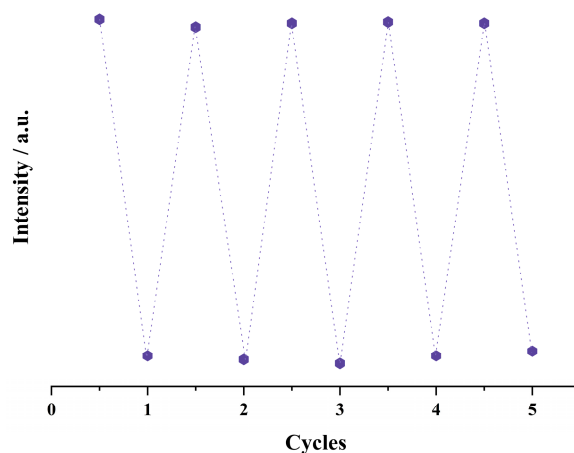

**Figure S10.** Recyclability of Complex Zn implemented with 1 mM  $\text{MnO}_4^-$  aqueous solution.

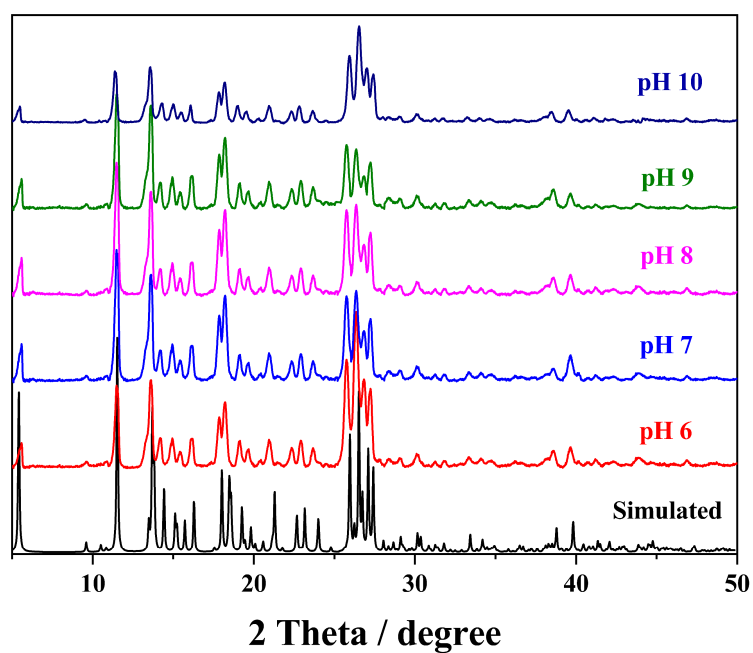

**Figure S11.** PXRD patterns of Complex Zn about pH resistance test: Complex Zn displayed strong stability in an aqueous solution with the pH values ranging from 6 to 10.

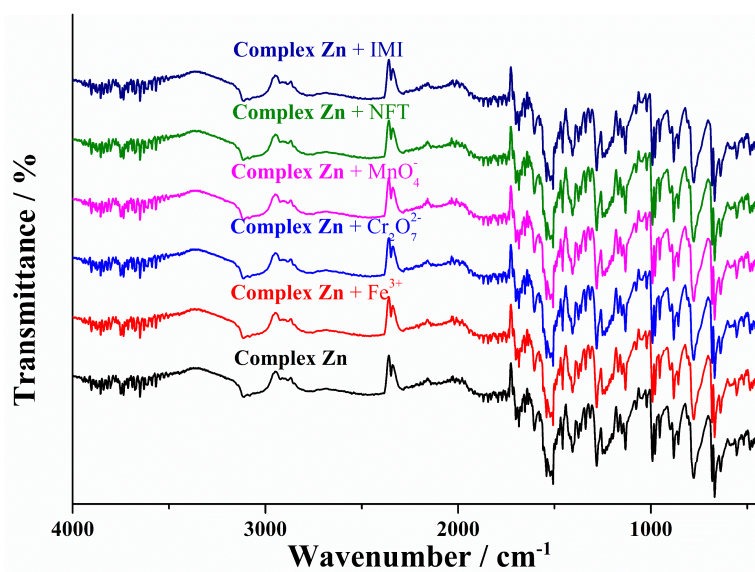

**Figure S12.** Comparison before and after adding test substance of FT-IR spectra of Complex Zn.

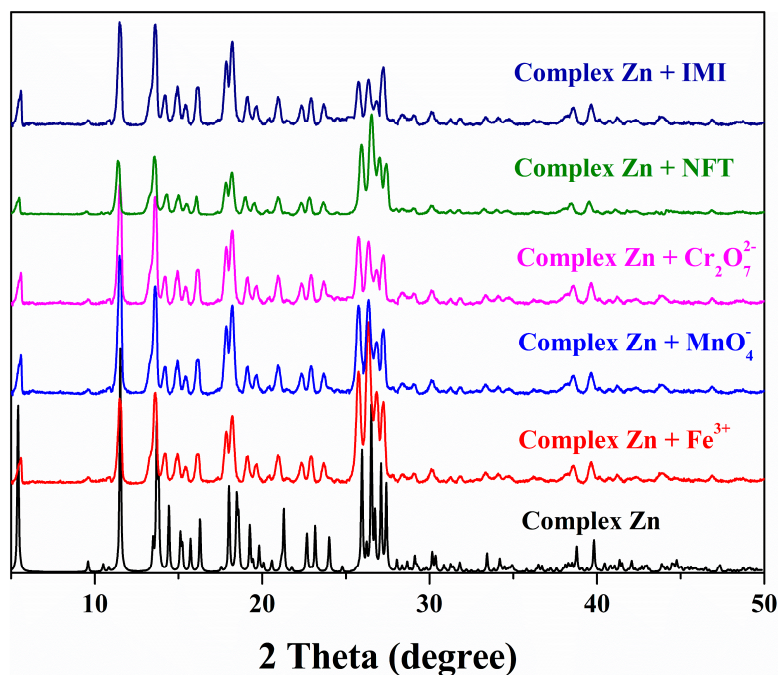

**Figure S13.** Comparison before and after adding test substance of PXRD patterns of Complex Zn.

**Disclaimer/Publisher's Note:** The statements, opinions and data contained in all publications are solely those of the individual author(s) and contributor(s) and not of MDPI and/or the editor(s). MDPI and/or the editor(s) disclaim responsibility for any injury to people or property resulting from any ideas, methods, instructions or products referred to in the content.
