# Supplementary material for: Design and Construction of a Mixed-Ligand Coordinated Fluorescent Complex and Its Application for Sensing Ions, Antibiotics, and Pesticides in Aqueous Solution
Source: MDPI journal article supplement (doi:10.3390/inorganics12040093), 2024-03-22
Supplement: s1 [file s1]

Archive with 1 entries (1 files):
- inorganics-2849273-supplementary.pdf
